# Supplementary material for: Multireference perturbation theory can predict a false ground state
Source: Royal Society of Chemistry journal article supplement (doi:10.1039/c000196a), 2010-01-01
Supplement: c000196a.pdf [file c000196a.pdf]

**Auxiliary material for:**

**Multireference perturbation theory can predict a false ground  
state**

Cristopher Camacho and Henryk A. Witek

*Institute of Molecular Science and Department of Applied Chemistry,  
National Chiao Tung University, 1001 Ta-Hsueh Road, Hsinchu 30010, Taiwan*

Renzo Cimiraglia

*Dipartimento di Chimica, Università di Ferrara,  
Via Borsari 46, I-44100 Ferrara, Italy*

The presented Auxiliary Materials reports the initial results obtained with NEVPT<sup>1</sup> for the  $^3\Sigma_u^-$  and  $^5\Sigma_u^-$  states of Sc<sub>2</sub> employing the same basis set and complete active space used throughout the studies presented in this communication. Figure A shows the potential energy curves for the  $^3\Sigma_u^-$  and  $^5\Sigma_u^-$  states of scandium dimer, from which it is clear that in the absence of intruder states the ground state of scandium dimer is  $^5\Sigma_u^-$ .

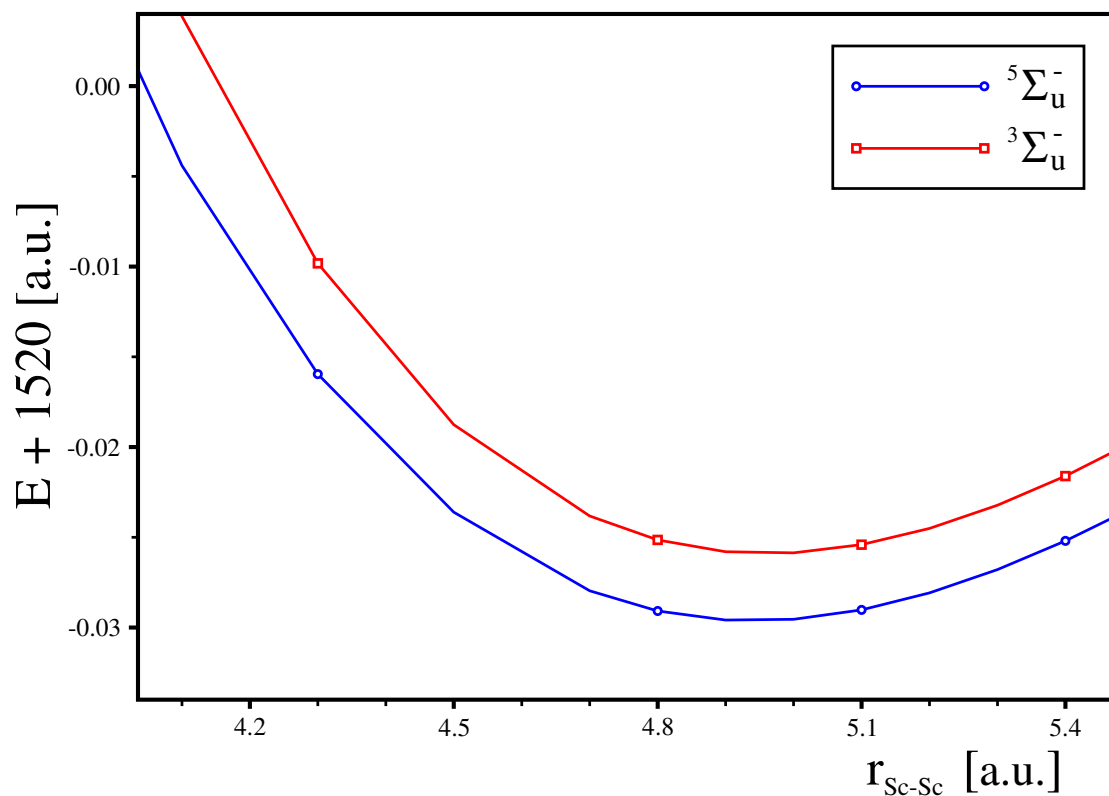

FIG. A. Potential energy curves for the  $^5\Sigma_u^-$  and  $^3\Sigma_u^-$  states obtained with the NEVPT2 method.

---

<sup>1</sup> C. Angeli, R. Cimiraglia, S. Evangelisti, T. Leininger and J.-P. Malrieu, *J. Chem. Phys.*, 2001, **114**, 10252.
